# Supplementary material for: An Investigation Into the Mechanism of Li Chong Pill for Treating Endometriosis Based on Network Pharmacology and Molecular Docking Verification
Source: Research Square preprint supplement (doi:10.21203/rs.3.rs-281498/v1), 2021-03-08
Supplement: Supplementary file 1 [file 4b5c2e46bb50052f546b6e31.xls]

## Sheet: Table S1
No.	Source	Component	OB(%)	DL(%)
1	Taoren	Sitosterol alpha1	43.28	0.78
2	Taoren	2,3-didehydro GA70	63.29	0.5
3	Taoren	2,3-didehydro GA77	88.08	0.53
4	Taoren	GA119	76.36	0.49
5	Taoren	GA120	84.85	0.45
6	Taoren	GA121-isolactone	72.7	0.54
7	Taoren	GA122	64.79	0.5
8	Taoren	GA122-isolactone	88.11	0.54
9	Taoren	gibberellin 17	94.64	0.49
10	Taoren	4a-formyl-7alpha-hydroxy-1-methyl-8-methylidene-4aalpha,4bbeta-gibbane-1alpha,10beta-dicarboxylic acid	88.6	0.46
11	Taoren	GA30	61.72	0.54
12	Taoren	Gibberellin A44	101.61	0.54
13	Taoren	GA54	64.21	0.53
14	Taoren	GA60	93.17	0.53
15	Taoren	GA63	65.54	0.54
16	Taoren	gibberellin 7	73.8	0.5
17	Taoren	GA77	87.89	0.53
18	Taoren	GA87	68.85	0.57
19	Taoren	3-O-p-coumaroylquinic acid	37.63	0.29
20	Taoren	Populoside_qt	108.89	0.2
21	Taoren	hederagenin	36.91	0.75
22	Taoren	beta-sitosterol	36.91	0.75
23	Taoren	campesterol	37.58	0.71
24	Danggui	beta-sitosterol	36.91	0.75
25	Danggui	Stigmasterol	43.83	0.76
26	Ezhu	hederagenin	36.91	0.75
27	Ezhu	wenjine	47.93	0.27
28	Ezhu	Bisdemethoxycurcumin	77.38	0.26
29	Huangqi	Mairin	55.38	0.78
30	Huangqi	Jaranol	50.83	0.29
31	Huangqi	hederagenin	36.91	0.75
32	Huangqi	(3S,8S,9S,10R,13R,14S,17R)-10,13-dimethyl-17-[(2R,5S)-5-propan-2-yloctan-2-yl]-2,3,4,7,8,9,11,12,14,15,16,17-dodecahydro-1H-cyclopenta[a]phenanthren-3-ol	36.23	0.78
33	Huangqi	isorhamnetin	49.6	0.31
34	Huangqi	3,9-di-O-methylnissolin	53.74	0.48
35	Huangqi	5'-hydroxyiso-muronulatol-2',5'-di-O-glucoside	41.72	0.69
36	Huangqi	7-O-methylisomucronulatol	74.69	0.3
37	Huangqi	9,10-dimethoxypterocarpan-3-O-β-D-glucoside	36.74	0.92
38	Huangqi	(6aR,11aR)-9,10-dimethoxy-6a,11a-dihydro-6H-benzofurano[3,2-c]chromen-3-ol	64.26	0.42
39	Huangqi	Bifendate	31.1	0.67
40	Huangqi	formononetin	69.67	0.21
41	Huangqi	isoflavanone	109.99	0.3
42	Huangqi	Calycosin	47.75	0.24
43	Huangqi	kaempferol	41.88	0.24
44	Huangqi	FA	68.96	0.71
45	Huangqi	(3R)-3-(2-hydroxy-3,4-dimethoxyphenyl)chroman-7-ol	67.67	0.26
46	Huangqi	isomucronulatol-7,2'-di-O-glucosiole	49.28	0.62
47	Huangqi	1,7-Dihydroxy-3,9-dimethoxy pterocarpene	39.05	0.48
48	Huangqi	quercetin	46.43	0.28
49	Sanleng	trans-gondoic acid	30.7	0.2
50	Sanleng	formononetin	69.67	0.21
51	Sanleng	hederagenin	36.91	0.75
52	Sanleng	beta-sitosterol	36.91	0.75
53	Sanleng	Stigmasterol	43.83	0.76
54	Zhimu	asperglaucide	58.02	0.52
55	Zhimu	Mangiferolic acid	36.16	0.84
56	Zhimu	kaempferol	41.88	0.24
57	Zhimu	Anhydroicaritin	45.41	0.44
58	Zhimu	Anemarsaponin F_qt	60.06	0.79
59	Zhimu	Chrysanthemaxanthin	38.72	0.58
60	Zhimu	Hippeastrine	51.65	0.62
61	Zhimu	Timosaponin B III_qt	35.26	0.87
62	Zhimu	Stigmasterol	43.83	0.76
63	Zhimu	Icariin I	41.58	0.61
64	Zhimu	Anemarsaponin C_qt	35.5	0.87
65	Zhimu	Anemarsaponin E_qt	30.67	0.86
66	Zhimu	(Z)-3-(4-hydroxy-3-methoxy-phenyl)-N-[2-(4-hydroxyphenyl)ethyl]acrylamide	118.35	0.26
67	Zhimu	diosgenin	80.88	0.81
68	Zhimu	coumaroyltyramine	112.9	0.2
